# Supplementary material for: A copillar[5]arene-based fluorescence “on–off–on” sensor is applied in sequential recognition of an iron cation and a fluoride anion
Source: Royal Society of Chemistry journal article supplement (doi:10.1039/c6nj03380f), 2017-01-01
Supplement: c6nj03380f1.pdf [file c6nj03380f1.pdf]

## Supporting Information

### **A copillar[5]arene-based fluorescent “on-off-on” sensor is applied in sequential recognition of iron cation and fluoride anion**

Jin-Fa Chen, Xiao-Bin Cheng, Hui Li, Qi Lin\*, Hong Yao, You-Ming Zhang, Tai-Bao

Wei\*

*Key Laboratory of Eco-Environment-Related Polymer Materials, Ministry of Education of China; Key Laboratory of Polymer Materials of Gansu Province; College of Chemistry and Chemical Engineering, Northwest Normal University, Lanzhou, Gansu, 730070, P. R. China*

# 1. Synthesis of copillar[5]arene DBP5

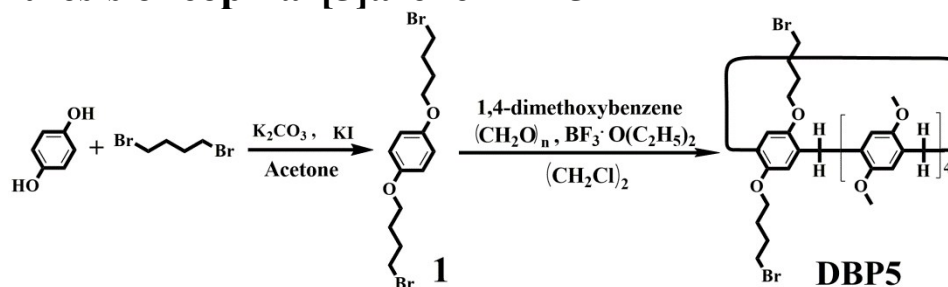

**Scheme S1** Synthesis of copillar[5]arene **DBP5**.

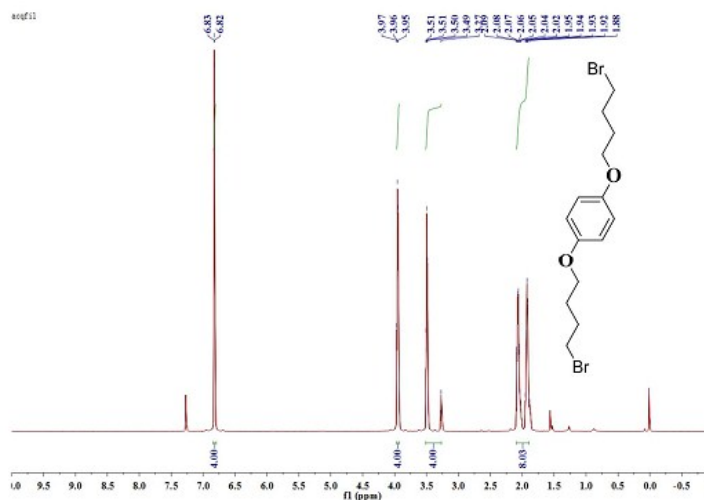

**Fig. S1**  $^1H$  NMR spectra (600 MHz,  $CDCl_3$ ) of 1,4-bis(4-bromobutoxy)benzene **1**.

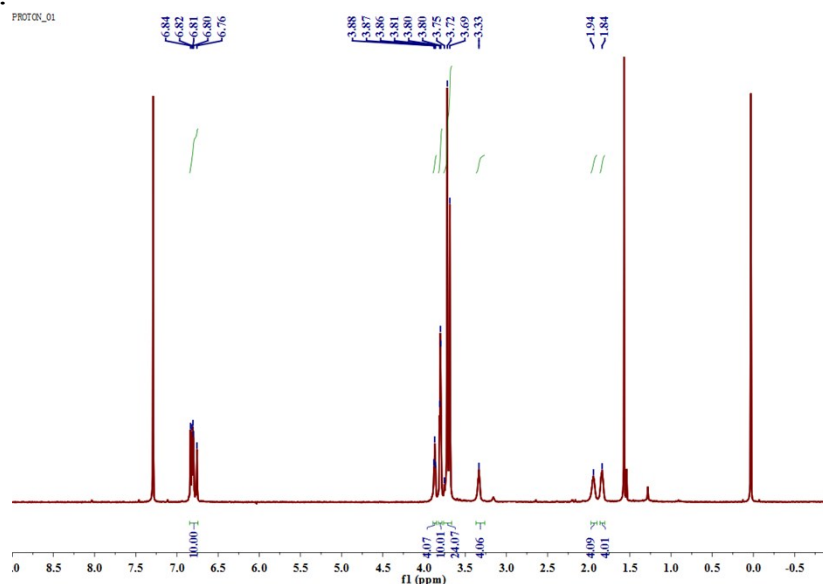

**Fig. S2**  $^1H$  NMR spectra(600 MHz,  $CDCl_3$ ) of a copillar[5]arene **DBP5**.

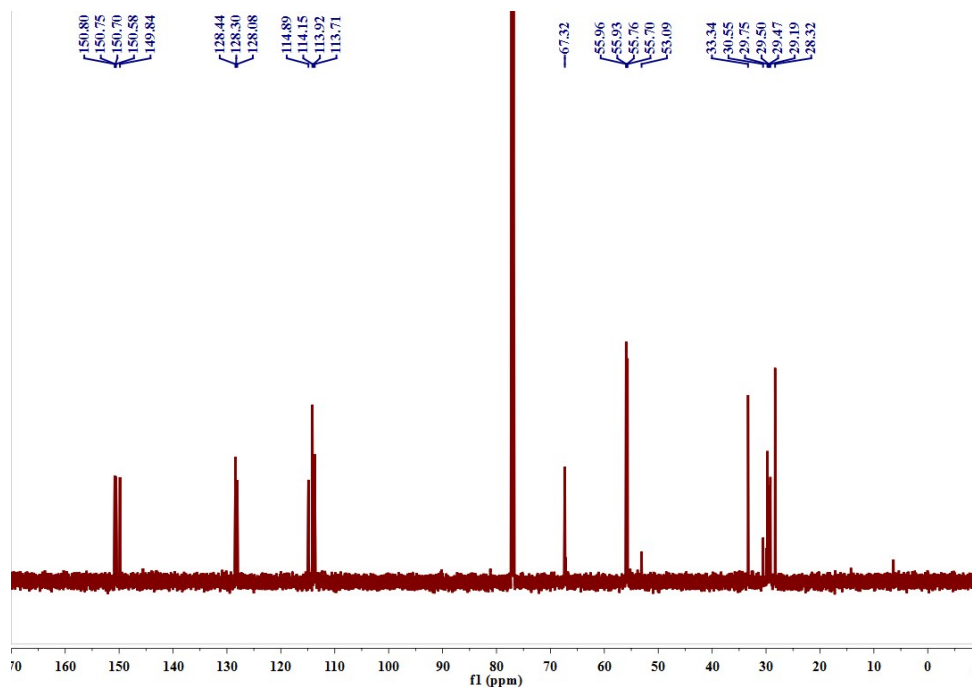

**Fig. S3** <sup>13</sup>C NMR spectra(151 MHz, CDCl<sub>3</sub>) of a copillar[5]arene **DBP5**.

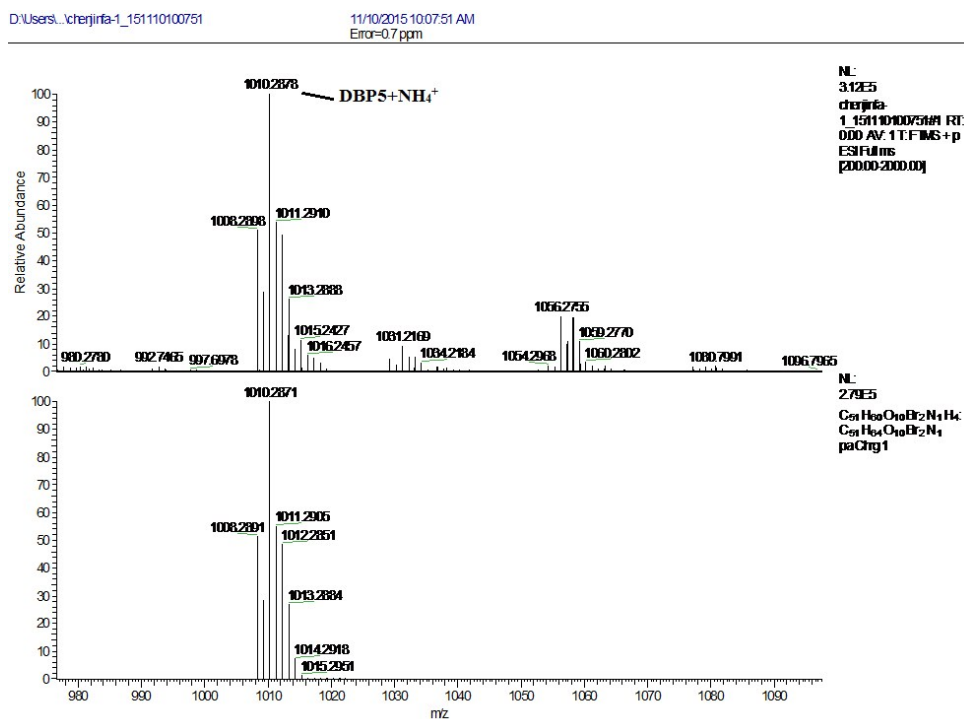

**Fig. S4** High resolution mass data of a copillar[5]arene **DBP5**.

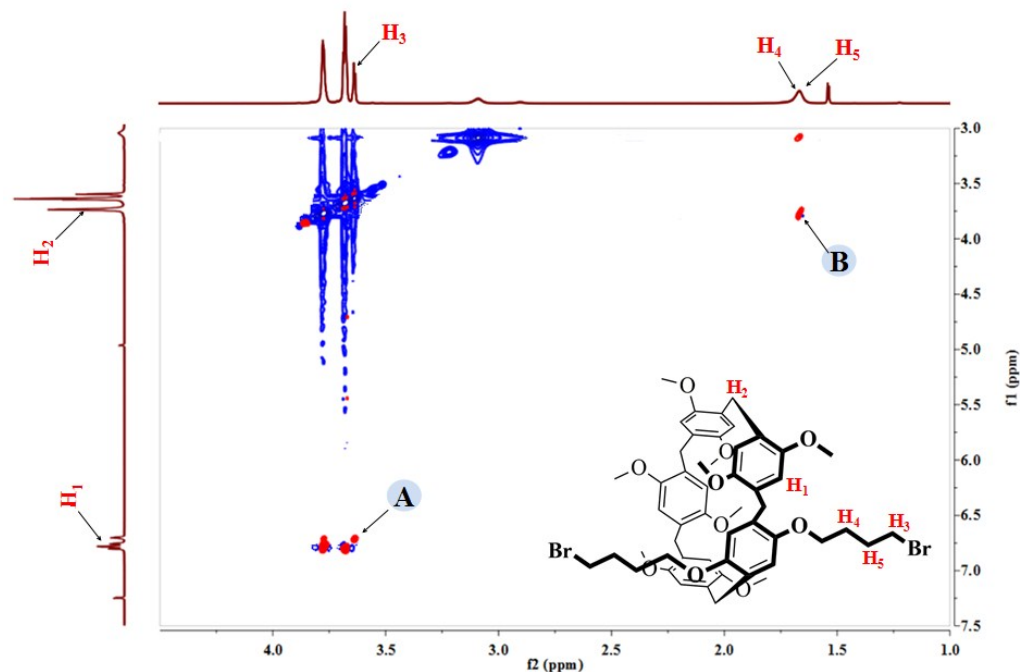

**Fig. S5** The 2D NOESY spectrum of (600 MHz, CDCl<sub>3</sub>, 298 K) of **DBP5** at 50.0 mM.

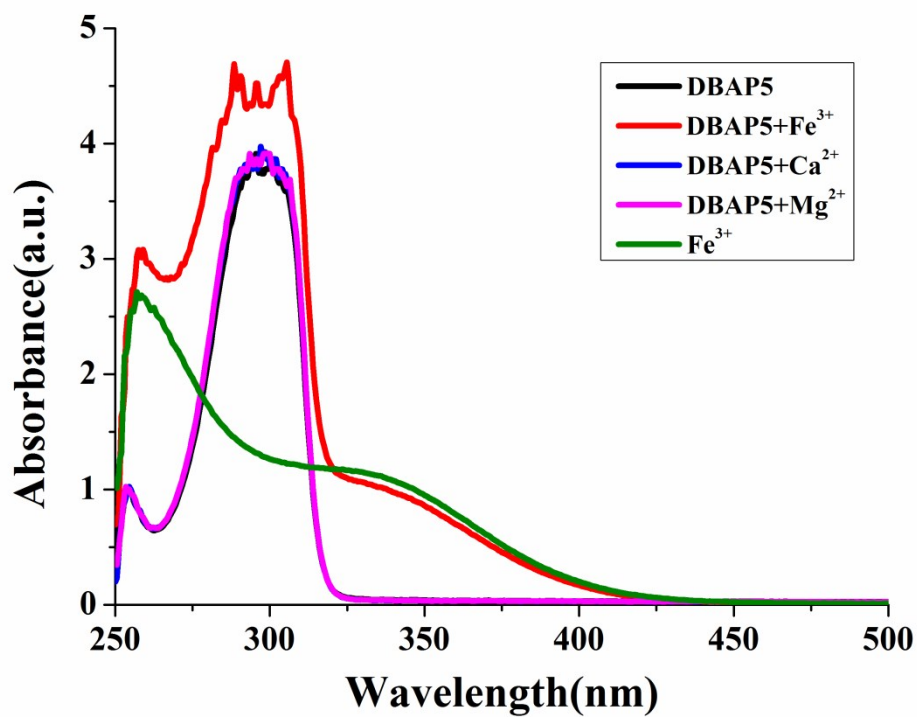

**Fig. S6** Absorbance spectra of **DBP5**, **DBP5+Fe<sup>3+</sup>**, **DBP5+Ca<sup>2+</sup>**, **DBP5+Mg<sup>2+</sup>** and **Fe<sup>3+</sup>** in H<sub>2</sub>O/DMSO (1 : 9, v/v).

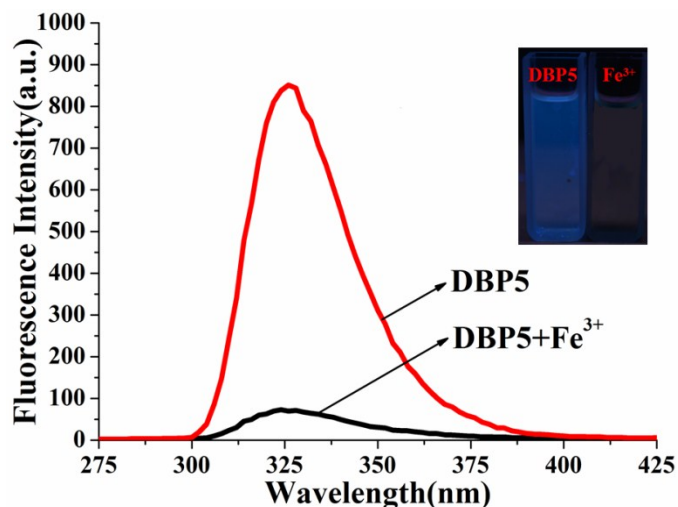

**Fig. S7** Fluorescence spectral response of **DBP5** ( $2 \times 10^{-4}$  M) in  $\text{H}_2\text{O}/\text{DMSO}$  (1 : 9 , v/v) solution upon addition of 2 equiv. of  $\text{Fe}^{3+}$  ( $\lambda_{\text{ex}} = 295$  nm). Inset: photograph of **DBP5** ( $2 \times 10^{-4}$  M) upon addition of 2 equiv. of  $\text{Fe}^{3+}$ , which was taken under a UV-lamp (365 nm).

### Determination of the detection limit

We use the  $3\delta$  way to figure out the detection limit. The process of the analysis as follows.

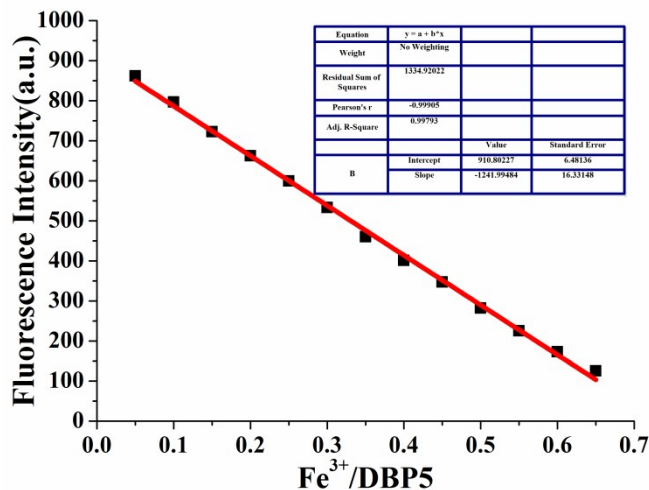

**Fig. S8** The photograph of the linear range.

Linear Equation:  $Y = -1241.99484X + 910.80227$   $R^2 = 0.9979$

$S = 1241.99 \times 10^6$

$$\delta = \sqrt{\frac{\sum (x_i - \bar{x})^2}{n-1}} = 6.82 (n = 30)$$

$K = 3$

$$\text{LOD} = K \times \delta / S = 1.65 \times 10^{-8} \text{M}$$

**Table S1** The detection limits of various analytical techniques about Fe<sup>3+</sup>.

| Analytical techniques          | The detection limits                  | Ref. |
|--------------------------------|---------------------------------------|------|
| Spectrophotometry              | $1.8 \times 10^{-6}$ mol/L (0.1 mg/L) | [S1] |
| Atomic absorption spectroscopy | $10^{-7}$ mol/L                       | [S2] |
| Voltammetry                    | $7.7 \times 10^{-9}$ mol/L            | [S3] |
| Electrophoresis                | $8.9 \times 10^{-6}$ mol/L (0.5 mg/L) | [S4] |

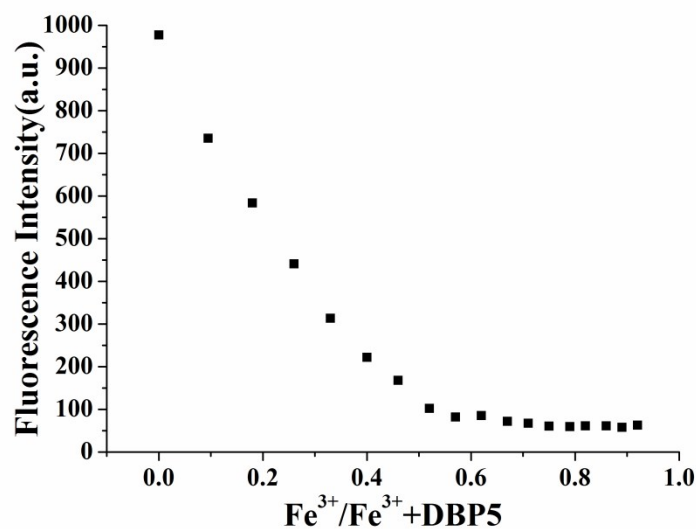

**Fig. S9** The Job's plot examined between Fe<sup>3+</sup> and **DBP5**, indicating the 1 : 1 stoichiometry, which was carried out by fluorescence spectra ( $\lambda_{\text{ex}} = 295$  nm).

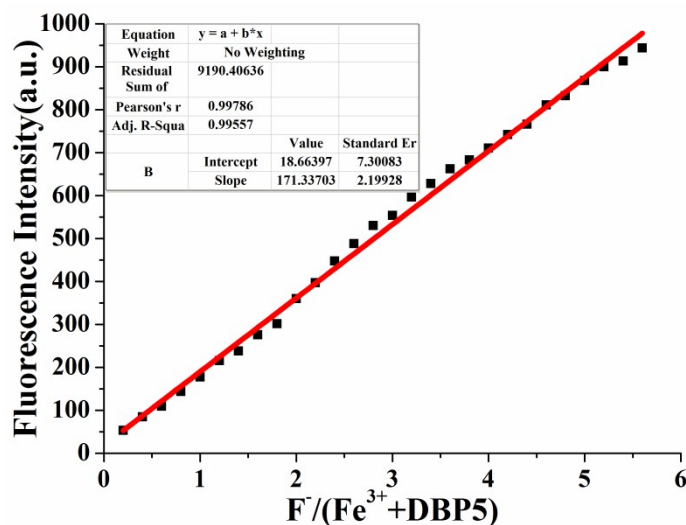

**Fig. S10** The photograph of the linear range.

Linear Equation:  $Y=171.33703X+18.66397$   $R^2=0.99557$

$$S=171.34 \times 10^6$$

$$\delta = \sqrt{\frac{\sum (x_i - \bar{x})^2}{n-1}} = 3.68 (n=30)$$

$$K=3$$

$$\text{LOD} = K \times \delta / S = 6.44 \times 10^{-8} \text{M}$$

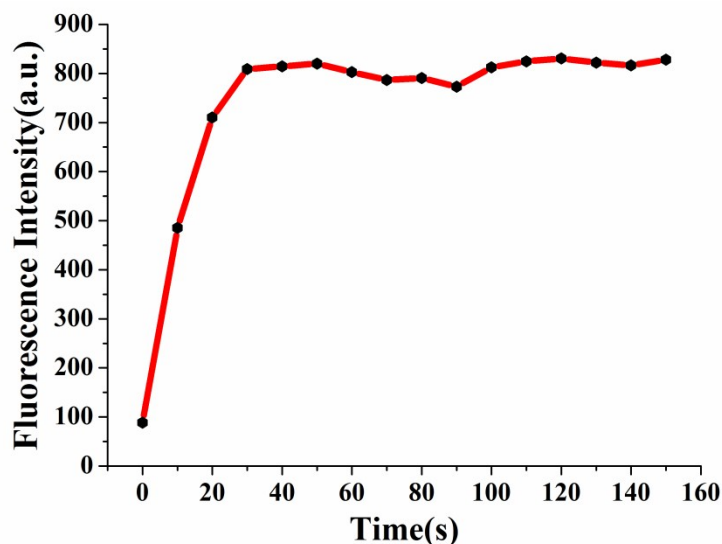

**Fig. S11** Time-dependent of **DBP5-Fe<sup>3+</sup>** ( $2 \times 10^{-4}$  M) upon addition of **F<sup>-</sup>** ( $1 \times 10^{-3}$  M) in **H<sub>2</sub>O/DMSO** (1 : 9 , v/v) with a plot of the fluorescence intensity that is estimated as the peak height at 330 nm.

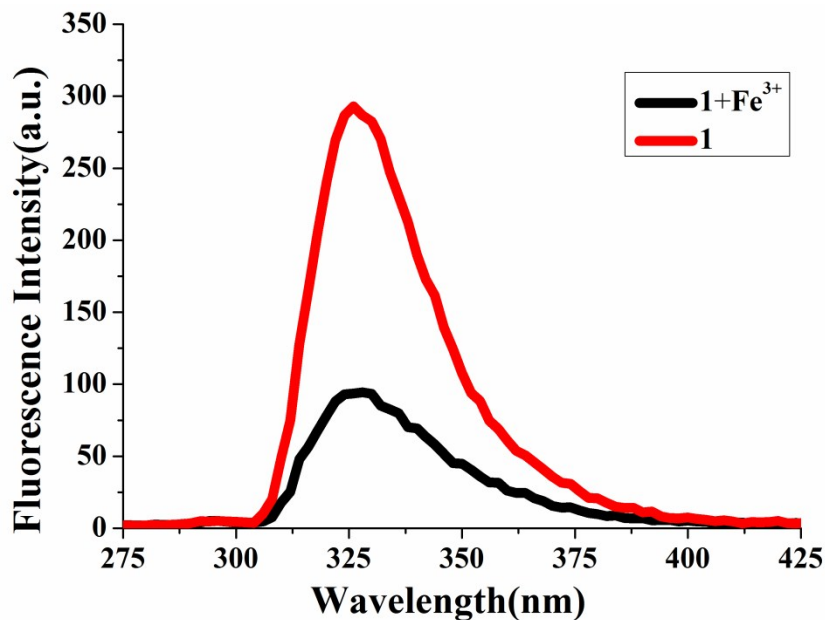

**Fig. S12** Fluorescence spectral response of **1** ( $2 \times 10^{-4}$  M) in **H<sub>2</sub>O/DMSO** (1 : 9 , v/v) upon addition of 2 equiv. of **Fe<sup>3+</sup>** ( $\lambda_{\text{ex}} = 295$  nm).

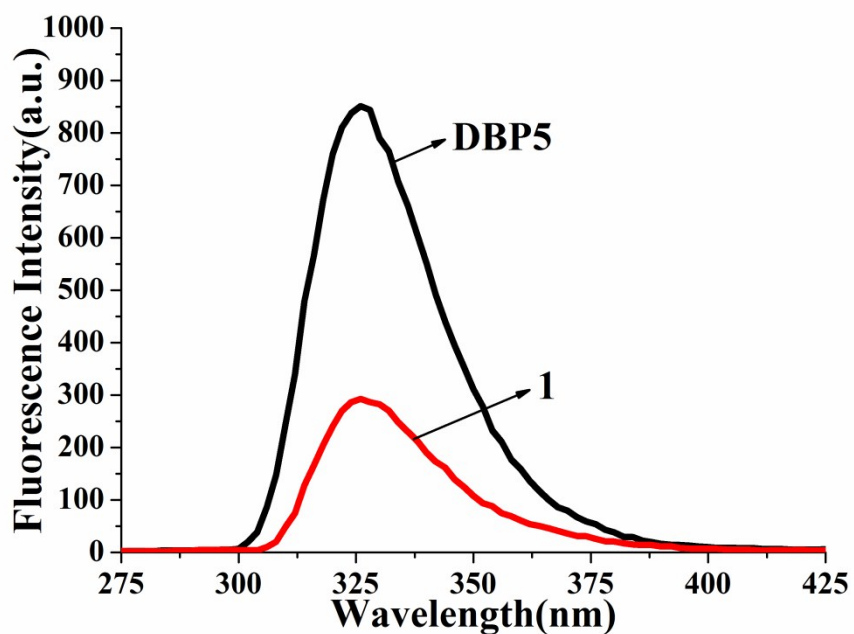

**Fig. S13** Fluorescence spectral response of **1** ( $2 \times 10^{-4}$  M) and **DBP5** ( $2 \times 10^{-4}$  M) in  $H_2O/DMSO$  (1 : 9 , v/v) ,  $\lambda_{ex} = 295$  nm.

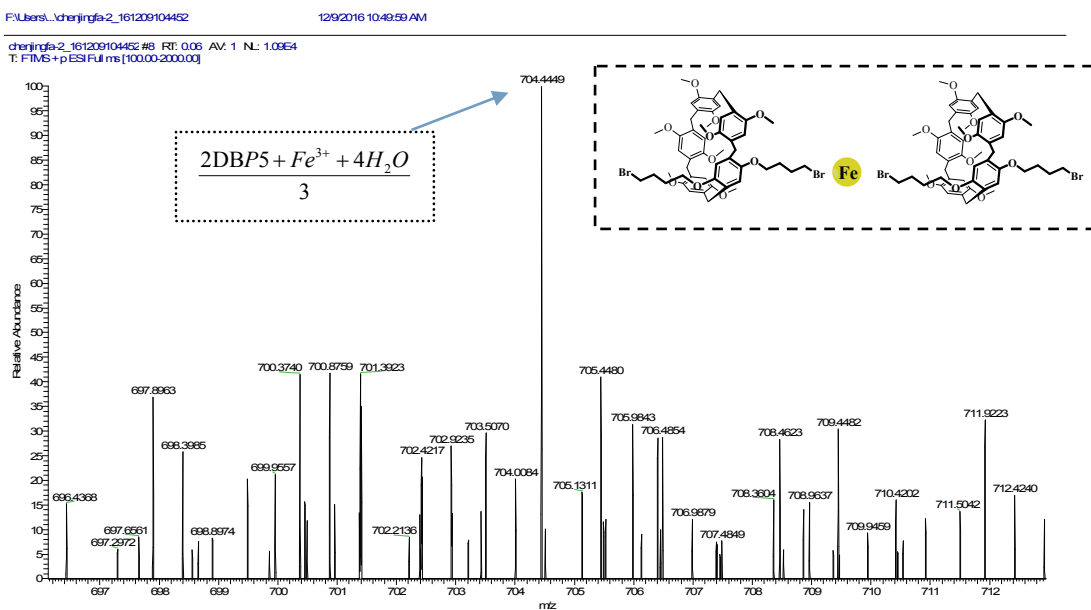

**Fig. S14** High resolution mass data of complex  $2DBP5 \cdot Fe^{3+}$ .



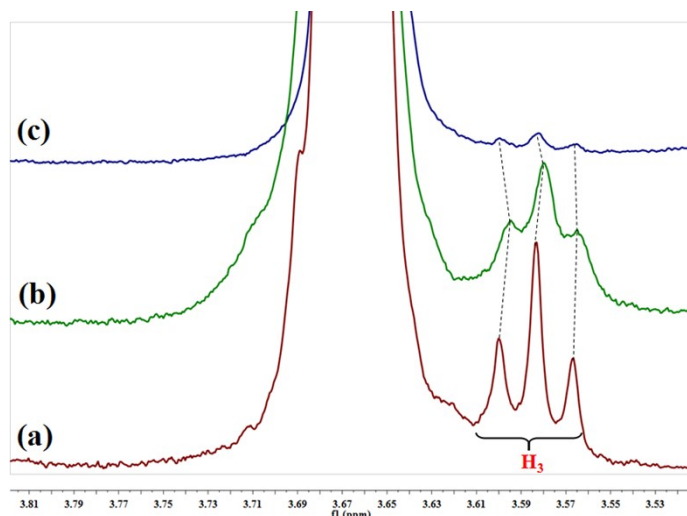

**Fig. S15** Partial  $^1\text{H}$  NMR spectra (600 MHz, 298 K) of (a) 5.0 mM DBP5; (b) 5.0 mM DBP5 and 10 mM  $\text{Fe}^{3+}$ ; (c) 5.0 mM DBP5, 10 mM  $\text{Fe}^{3+}$  and 25 mM  $\text{F}^-$ .

**Table S2** X-ray crystal data of **DBP5**

|                           |                                                                                                                                        |
|---------------------------|----------------------------------------------------------------------------------------------------------------------------------------|
| chemical formula          | $\text{C}_{51}\text{H}_{60}\text{Br}_2\text{O}_{10}$                                                                                   |
| Chemical formula weight   | 992.81                                                                                                                                 |
| Crystal system            | triclinic                                                                                                                              |
| Space group               | P-1                                                                                                                                    |
| Cell length a             | 11.8851(10)                                                                                                                            |
| Cell length b             | 12.1025(10)                                                                                                                            |
| Cell length c             | 21.0450(13)                                                                                                                            |
| Volume                    | 2566.6(3)                                                                                                                              |
| Z                         | 2                                                                                                                                      |
| Temperature               | 294.44(10) K                                                                                                                           |
| Crystal color             | clear dark yellow                                                                                                                      |
| Crystal F 000             | 1032                                                                                                                                   |
| Crystal density           | 1.285                                                                                                                                  |
| Special details           | Solvent masking has been carried out                                                                                                   |
| Radiation wavelength      | 0.71073 Å                                                                                                                              |
| Measurement device        | four-circle diffractometer                                                                                                             |
| Measurement device type   | SuperNova, Dual, Cu at zero, Eos                                                                                                       |
| Measurement method        | \w scans                                                                                                                               |
| Computing cell refinement | CrysAlisPro, Agilent Technologies,<br>Version 1.171.37.35 (release 13-08-<br>2014 CrysAlis171 .NET)<br>(compiled Aug 13 2014,18:06:01) |

---

|                           |                                                                                                                                        |
|---------------------------|----------------------------------------------------------------------------------------------------------------------------------------|
| Computing data collection | CrysAlisPro, Agilent Technologies,<br>Version 1.171.37.35 (release 13-08-<br>2014 CrysAlis171 .NET)<br>(compiled Aug 13 2014,18:06:01) |
| Structure refinement      | ShelXL (Sheldrick, 2015)                                                                                                               |

---

***References:***

- [S1] L. V. Mulaudzi, J. F. van Staden and R. I. Stefan, *Anal. Chim. Acta*, 2002, **467**, 35.
- [S2] A. Ohashi, H. Ito, C. Kanai, H. Imura and K. Ohashi, *Talanta*, 2005, **65**, 525.
- [S3] A. Bobrowski, K. Nowak and J. Zarebski, *Anal. Bioanal. Chem.*, 2005, **382**, 1691.
- [S4] C. Ortega, S. Cerutti, R. A. Olsina, L. D. Martínez and M. F. Silav, *J. Pharm. Biomed. Anal.*, 2004, **36**, 721.

---

\* Corresponding author. Tel: +86 931 7970394.

E-mail address: [weitaibao@126.com](mailto:weitaibao@126.com).
